## RESEARCH ARTICLE

# Anaplerotic reactions active during growth of *Saccharomyces cerevisiae* on glycerol

Joeline Xiberras, Mathias Klein, Celina Prosch, Zahabiya Malubhoy and Elke Nevoigt\*

Department of Life Sciences and Chemistry, Jacobs University Bremen gGmbH, Campus Ring 1, 28759 Bremen, Germany

\*Corresponding author: Department of Life Sciences and Chemistry, Jacobs University Bremen gGmbH, Campus Ring 1, 28759 Bremen, Germany.  
E-mail: [e.nevoigt@jacobs-university.de](mailto:e.nevoigt@jacobs-university.de)

**One sentence summary:** In comparison to glucose or ethanol as carbon sources, the yeast *S. cerevisiae* shows a higher metabolic flexibility with regard to the active anaplerotic reactions during growth on glycerol.

Editor: Pascale Daran-Lapujade

## ABSTRACT

Anaplerotic reactions replenish TCA cycle intermediates during growth. In *Saccharomyces cerevisiae*, pyruvate carboxylase and the glyoxylate cycle have been experimentally identified to be the main anaplerotic routes during growth on glucose (C6) and ethanol (C2), respectively. The current study investigates the importance of the two isoenzymes of pyruvate carboxylase (PYC1 and PYC2) and one of the key enzymes of the glyoxylate cycle (ICL1) for growth on glycerol (C3) as a sole carbon source. As the wild-type strains of the GEN.PK family are unable to grow in pure synthetic glycerol medium, a reverse engineered derivative showing a maximum specific growth rate of  $0.14 \text{ h}^{-1}$  was used as the reference strain. While the deletion of PYC1 reduced the maximum specific growth rate by about 38%, the deletion of PYC2 had no significant impact, neither in the reference strain nor in the *pyc1*Δ mutant. The deletion of ICL1 only marginally reduced growth of the reference strain but further decreased the growth rate of the *pyc1*Δ deletion strain by 20%. Interestingly, the triple deletion (*pyc1*Δ *pyc2*Δ *icl1*Δ) did not show any growth. Therefore, both the pyruvate carboxylase and the glyoxylate cycle are involved in anaplerosis during growth on glycerol.

**Keywords:** glycerol; anaplerotic reactions; pyruvate carboxylase; glyoxylate cycle; *Saccharomyces cerevisiae*

## INTRODUCTION

During the last decades, the yeast *Saccharomyces cerevisiae* has become a well-established model organism for understanding fundamental cellular processes relevant to higher eukaryotes (Galao et al. 2007). In addition, it is a favorite microbial cell factory in industrial biotechnology. In fact, this organism has been extensively engineered to produce a wide range of products including bulk chemicals (e.g. succinic acid), biofuels (e.g. isobutanol) as well as nutraceuticals and pharmaceuticals (Nevoigt 2008; Borodina and Nielsen 2014; Chen and Nielsen 2016).

Sugars are the preferred carbon source of *S. cerevisiae*. As a Crabtree-positive yeast, *S. cerevisiae* undergoes alcoholic fermentation when glucose in the environment exceeds a certain threshold concentration even in the presence of oxygen (Crabtree 1929; De Deken 1966). Only after glucose depletion and diauxic shift, the fermentation products, ethanol and glycerol, can also be used for the generation of energy and cellular biomass. In contrast to glucose, the latter two carbon sources are metabolized in a completely respiratory manner by wild-type *S. cerevisiae* (Schüller 2003; Turcotte et al. 2010).

Received: 10 September 2019; Accepted: 9 December 2019

© The Author(s) 2019. Published by Oxford University Press on behalf of FEMS. All rights reserved. For permissions, please e-mail: [journals.permissions@oup.com](mailto:journals.permissions@oup.com)

**Table 1** *Saccharomyces cerevisiae* strains used in this study.

| Strain                                                                                         | Genome modifications                                                                                                                                 | Source or reference |
|------------------------------------------------------------------------------------------------|------------------------------------------------------------------------------------------------------------------------------------------------------|---------------------|
| CEN.PK113-1A UBR2 <sub>CBS</sub> GUT1 <sub>JL1</sub>                                           | <i>ubr2::UBR2</i> <sub>CBS 6412-13A</sub> ; <i>gut1::GUT1</i> <sub>JL1</sub>                                                                         | Ho et al. (2017)    |
| CEN.PK113-1A UBR2 <sub>CBS</sub> GUT1 <sub>JL1</sub> <i>pyc1</i> Δ                             | <i>ubr2::UBR2</i> <sub>CBS 6412-13A</sub> ; <i>gut1::GUT1</i> <sub>JL1</sub> <i>pyc1::loxP-ble-loxP</i>                                              | This study          |
| CEN.PK113-1A UBR2 <sub>CBS</sub> GUT1 <sub>JL1</sub> <i>pyc2</i> Δ                             | <i>ubr2::UBR2</i> <sub>CBS 6412-13A</sub> ; <i>gut1::GUT1</i> <sub>JL1</sub> <i>pyc2::loxP-ble-loxP</i>                                              | This study          |
| CEN.PK113-1A UBR2 <sub>CBS</sub> GUT1 <sub>JL1</sub> <i>pyc1</i> Δ <i>pyc2</i> Δ               | <i>ubr2::UBR2</i> <sub>CBS 6412-13A</sub> <i>gut1::GUT1</i> <sub>JL1</sub> <i>pyc1::loxP</i> <i>pyc2::loxP-ble-loxP</i>                              | This study          |
| CEN.PK113-1A UBR2 <sub>CBS</sub> GUT1 <sub>JL1</sub> <i>icl1</i> Δ                             | <i>ubr2::UBR2</i> <sub>CBS 6412-13A</sub> <i>gut1::GUT1</i> <sub>JL1</sub> <i>icl1::loxP</i>                                                         | This study          |
| CEN.PK113-1A UBR2 <sub>CBS</sub> GUT1 <sub>JL1</sub> <i>icl1</i> Δ <i>pyc1</i> Δ               | <i>ubr2::UBR2</i> <sub>CBS 6412-13A</sub> <i>gut1::GUT1</i> <sub>JL1</sub> <i>icl1::loxP</i> <i>pyc1::loxP-ble-loxP</i>                              | This study          |
| CEN.PK113-1A UBR2 <sub>CBS</sub> GUT1 <sub>JL1</sub> <i>icl1</i> Δ <i>pyc2</i> Δ               | <i>ubr2::UBR2</i> <sub>CBS 6412-13A</sub> <i>gut1::GUT1</i> <sub>JL1</sub> <i>icl1::loxP</i> <i>pyc2::loxP-ble-loxP</i>                              | This study          |
| CEN.PK113-1A UBR2 <sub>CBS</sub> GUT1 <sub>JL1</sub> <i>icl1</i> Δ <i>pyc1</i> Δ <i>pyc2</i> Δ | <i>ubr2::UBR2</i> <sub>CBS 6412-13A</sub> ; <i>gut1::GUT1</i> <sub>JL1</sub> <i>icl1::loxP</i> <i>pyc1::loxP-ble-loxP</i> <i>pyc2::loxP-nat-loxP</i> | This study          |

Anaplerotic reactions are pivotal in central carbon metabolism since they are responsible for the replenishment of TCA cycle intermediates during growth. In industrial biotechnology, anaplerotic reactions are of utmost importance when re-routing fluxes of the central carbon metabolism towards valuable fermentation products because the operating route strongly influences ATP and co-factor balance of the cell (Zelle et al. 2010; Zelle et al. 2011). The major anaplerotic routes in *S. cerevisiae* have been characterized when cells were grown on glucose or ethanol. On glucose, pyruvate carboxylase, which is encoded by the two isogenes *PYC1* and *PYC2* in this species, is the main anaplerotic enzyme (Morris, Lim and Wallace 1987; Stucka et al. 1991; Walker et al. 1991). The enzyme catalyzes the ATP-dependent carboxylation of pyruvate to oxaloacetate (Gailiussis, Rinne and Benedict 1964) and a *pyc1*Δ *pyc2*Δ double deletion mutant is not able to grow in medium containing glucose as the sole carbon source unless supplemented with aspartate (Stucka et al. 1991; Brewster et al. 1994; Blazquez, Gamo and Gancedo 1995). The deamination of aspartate yields oxaloacetate, thus bypassing the need for an anaplerotic conversion of C3 to C4 compounds (De Jong-Gubbels et al. 1998). During growth on ethanol (and other C2 carbon sources), C4 carbon units for the replenishment of the TCA cycle (at the level of succinate) are synthesized from acetyl-CoA as the central intermediate via the activity of the glyoxylate cycle. This has been confirmed by Schöler and Schüller (1993) who showed that a mutant strain deleted for isocitrate lyase (encoded by *ICL1*), which is one of the key enzymes for the glyoxylate cycle, cannot grow on ethanol. Knowledge about the anaplerotic reactions occurring when *S. cerevisiae* grows on glycerol is fairly fragmentary. Although glycerol has been considered a non-fermentable carbon source in *S. cerevisiae* similar to ethanol (Schüller 2003; Turcotte et al. 2010), the different numbers of carbon atoms (C3 vs. C2) of these two compounds might require substantially different metabolic fluxes (including anaplerotic reactions) during their metabolism as discussed by Xiberras, Klein and Nevoigt (2019). Therefore, it is questionable whether the glyoxylate cycle is indispensable during growth on glycerol.

Notably, glycerol is an attractive substrate for biotechnological processes because it is an inevitable by-product of the biodiesel industry, which generates ~10% (w/v) glycerol (Yazdani and Gonzalez 2007). Apart from being abundant, glycerol also has a higher degree of reduction (4.7) compared to sugars such as glucose and xylose (4.0). This feature can generally lead to higher maximum theoretical product yields of reduced target molecules (Yazdani and Gonzalez 2007; Mattam et al. 2013; Zhang et al. 2013). The fact that it does not exert the above-mentioned Crabtree effect caused by glucose and other sugars can be another advantage of the 'non-fermentable' carbon source glycerol for the production of biomass and

biomass-related products (Fowler and Dunlop 1989; Delvigne et al. 2006; Ochoa-Estopier et al. 2011).

The goal of the current study was to investigate the main anaplerotic routes active in *S. cerevisiae* growing in synthetic glycerol medium and particularly clarify the role of the glyoxylate cycle. A prerequisite for such a study is a strain able to grow in pure synthetic glycerol medium since growth-supporting supplements, such as amino acids and nucleic bases can interfere with the anaplerotic reactions. However, it is well-known that wild-type strains of the CEN.PK family, which are popular for physiological studies in *S. cerevisiae*, are not able to grow in synthetic glycerol medium (Swinnen et al. 2013). Therefore, a reverse engineered derivative of CEN.PK113-1A constructed by Ho et al. (2017) (CEN.PK113-1A UBR2<sub>CBS</sub> GUT1<sub>JL1</sub>), which grows with a maximum rate ( $\mu_{max}$ ) of ~0.14 h<sup>-1</sup> in synthetic glycerol medium, was used as a reference strain in the current study. This strain carries allele replacements for both UBR2 (encoding a cytoplasmic ubiquitin-protein ligase (E3)) and GUT1 (encoding the glycerol kinase involved in the glycerol catabolic pathway). The implemented UBR2 allele originated from the natural glycerol-consuming *S. cerevisiae* isolate CBS 6412-13A (Swinnen et al. 2016) while the used GUT1 allele was obtained from the CEN.PK113-7D derivative generated for improved glycerol utilization by adaptive laboratory evolution (Ho et al. 2017).

## MATERIALS AND METHODS

### Strains, plasmids, medium composition and general cultivation conditions

The strains used in this study are listed in Table 1. Yeast cells were routinely grown on either solid YPD (*icl1*Δ, *icl1*Δ *pyc1*Δ and *icl1*Δ *pyc2*Δ mutants), YPD with 0.5% aspartate (*icl1*Δ *pyc1*Δ *pyc2*Δ mutant) or YPE medium (*pyc1*Δ, *pyc2*Δ and *pyc1*Δ *pyc2*Δ mutants) containing 10 g/L yeast extract, 20 g/L peptone, 20 g/L glucose or 30 mL/L ethanol and 15 g/L agar. Agar plates were cultivated in a static incubator at 30°C. Media were supplemented with phleomycin (20 mg/L) or nourseothricin (100 mg/L) for selection purposes when needed.

For qualitative and quantitative growth assessment, cells were grown in synthetic medium containing either 20 g/L glucose, 30 mL/L ethanol or 60 mL/L glycerol and ammonium sulfate as nitrogen source, respectively. The synthetic medium was prepared according to Verduyn et al. (1992), including 3 g/L KH<sub>2</sub>PO<sub>4</sub>, 0.5 g/L MgSO<sub>4</sub>·7H<sub>2</sub>O, 15 mg/L EDTA, 4.5 mg/L ZnSO<sub>4</sub>·7H<sub>2</sub>O, 0.84 mg/L MnCl<sub>2</sub>·2H<sub>2</sub>O, 0.3 mg/L CoCl<sub>2</sub>·6H<sub>2</sub>O, 0.3 mg/L CuSO<sub>4</sub>·5H<sub>2</sub>O, 0.4 mg/L NaMoO<sub>4</sub>·2H<sub>2</sub>O, 4.5 mg/L CaCl<sub>2</sub>·2H<sub>2</sub>O, 3 mg/L FeSO<sub>4</sub>·7H<sub>2</sub>O, 1 mg/L H<sub>3</sub>BO<sub>3</sub> and 0.1 mg/L KI. After heat sterilization of the medium, filter sterilized vitamins were added. Final vitamin concentrations were 0.05

**Table 2.** Primers used in this study.

| Purpose                 | Primer number | Sequence (5'–3')                                                      |
|-------------------------|---------------|-----------------------------------------------------------------------|
| Deletion of <i>PYC1</i> | 775           | AGATAACAAAAGGAAAATCTCAGCCTCTCCCTTCTCTTAGACACCAGCTGAAGCTTCGTACGC       |
|                         | 776           | AGATTTCGGGTATATTATACATTATAAATGAGAAGTAACCGGTCGCATAGGCCACTAGTGGATCTG    |
| Deletion of <i>PYC2</i> | 828           | GGCAGAGCCAGCTCTTCTGTGATTGGCAGAGAGGGTCTTCCAGCTGAAGCTTCGTACGC           |
|                         | 829           | CATTAAGGAAGAAACACAGTTAGCAGTATTTTCATCGAAAGCATAGGCCACTAGTGGATCTG        |
| Deletion of <i>ICL1</i> | 1189          | AACAATTGAGAGAAAACCTTAGCATAACATAACAAAAAGTCAACGAAAACAGCTGAAGCTTCGTACGC  |
|                         | 1190          | ATATACTTGTGAGGAAATGCCGGCAGTTCTAATGGTTAATCCTTGTCGCATAGGCCACTAGTGGATCTG |

mg/L D-(+)-biotin, 1 mg/L D-pantothenic acid hemicalcium salt, 1 mg/L nicotinic acid, 25 mg/L myo-inositol, 1 mg/L thiamine chloride hydrochloride, 1 mg/L pyridoxine hydrochloride and 0.2 mg/L 4-aminobenzoic acid. In case aspartate was used as a supplement, 0.5% was added to the medium prior autoclaving. The pH of the synthetic glucose and synthetic ethanol medium was adjusted to 6.5 with 4 M KOH, while that of synthetic glycerol medium was adjusted to 4.0 with 2 M H<sub>3</sub>PO<sub>4</sub>.

*Escherichia coli* DH5 $\alpha$  was used for plasmid construction and isolation, and cells were routinely grown in lysogeny broth (LB) containing 10 g/L NaCl, 5 g/L yeast extract and 10 g/L peptone, and adjusted to a pH of 7.5 with 2 M NaOH (Bertani 1951). For selection and maintenance of plasmid containing cells, 100 mg/L ampicillin was added.

### General molecular biology techniques

Preparative PCRs for cloning as well as for sequence determination of deletion cassettes integrated into the genome were performed using Phusion® High-Fidelity DNA Polymerase (New England BioLabs, Frankfurt am Main, Germany). PCR conditions were adapted to the guidelines of the respective manufacturer. PCR products were purified by using the GeneJET PCR Purification Kit (Thermo Fischer Scientific, Waltham, Massachusetts, USA).

### Genetic modifications of *S. cerevisiae*

Deletions of either *PYC1*, *PYC2* or *ICL1* were obtained using a disruption cassette containing either a phleomycin (*ble*<sup>r</sup>) or nourseothricin (*clonNAT*, *nat*<sup>r</sup>) resistance marker. The deletion cassettes were amplified from plasmid pUG66 and pUG74, respectively, (Gueldener et al. 2002) using primers listed in Table 2. The primers contained at their 5' terminal end, a 60-bp sequence, complementary to the region immediately upstream or downstream of the start or stop codon of the gene to be deleted. Transformation of *S. cerevisiae* with the deletion cassettes was performed according to the lithium acetate method described by Gietz et al. (1995). Double and/or triple deletions were achieved either by consecutive transformations of the respective deletion cassettes or else by first removing the existing marker according to Sauer and Henderson (1988) and then transforming *S. cerevisiae* with the respective deletion cassette.

### Qualitative and quantitative analysis of growth on glycerol

The qualitative and quantitative analyses of *S. cerevisiae* growth were conducted following the procedure described by Swinnen et al. (2013) with slight modifications. The main difference between the qualitative and the quantitative

growth analysis was the use of the carbon source for pre- and intermediate cultures. For qualitative analysis, pre- and intermediate cultures were performed using glucose (for *icl1* $\Delta$ , *icl1* $\Delta$  *pyc1* $\Delta$  and *icl1* $\Delta$  *pyc2* $\Delta$  mutants), glucose plus 0.5% aspartate (for the *icl1* $\Delta$  *pyc1* $\Delta$  *pyc2* $\Delta$  mutant) or ethanol (for *pyc1* $\Delta$ , *pyc2* $\Delta$  and *pyc1* $\Delta$  *pyc2* $\Delta$  mutants). For quantitative analysis, the respective cultivations were all performed using glycerol as the carbon source. In general, cells from a single colony were used to inoculate 3 mL of the synthetic medium in a 10 mL glass tube with the respective carbon source and this pre-culture was incubated at orbital shaking of 200 rpm and 30°C for 24 hours. The pre-culture was then used to inoculate 4 mL of the same medium in a 10 mL glass tube adjusting to an OD<sub>600</sub> of 0.2. This culture, referred to as intermediate culture, was cultivated at the same conditions for 48 hours. For qualitative analysis, the appropriate volume from the intermediate culture necessary to adjust an OD<sub>600</sub> of 0.2 was centrifuged at 800 g for 5 minutes and the supernatant discarded. The cell pellet was then washed once by re-suspending the cells in synthetic glycerol medium, re-centrifuged and re-suspended in 4 mL of the same medium in a 10 mL glass tube. For quantitative analysis, the appropriate culture volume to adjust an OD<sub>600</sub> of 0.2 was directly resuspended in 4 mL of the main culture medium in a 10 mL glass tube. The main cultures for qualitative growth analysis were incubated at orbital shaking of 200 rpm and 30°C and growth relative to the reference strain was assessed at regular time intervals. For quantitative analysis, two aliquots (750  $\mu$ L each) of the main culture were immediately transferred from the 10 mL glass tube to separate wells of a white Krystal TM 24-well clear bottom microplate (Porvair Sciences, Leatherhead, United Kingdom) and cultivated in the Growth Profiler 1152 (EnzyScreen, Haarlem, The Netherlands) at 30°C and orbital shaking at 200 rpm. The growth profiler took a scan of the plate every 40 minutes. These scans were used to calculate the density of the cultures expressed as green values (G-values). Subsequently, the G-values were expressed as OD<sub>600</sub> values (referred to as OD<sub>600</sub> equivalents) using the following calibration curve: OD<sub>600</sub> equivalent = 6.1761 10<sup>-8</sup> \* (G-value)<sup>3.4784</sup>.

## RESULTS AND DISCUSSION

To identify the anaplerotic reactions active on glycerol, we first focused on those routes that were known to be important on glucose and ethanol, i.e. pyruvate carboxylase and the glyoxylate cycle as mentioned in the introduction. To study the role of *PYC* (Fig. 1), we deleted *PYC1* and *PYC2* individually and in combination in our chosen reference strain. Growth of all constructed strains was first qualitatively assessed in liquid synthetic glycerol medium as described in Materials and Methods. As *pyc1/2* double deletion mutants are incapable of growth on glucose as the sole carbon source (Stucka et al. 1991; Brewster

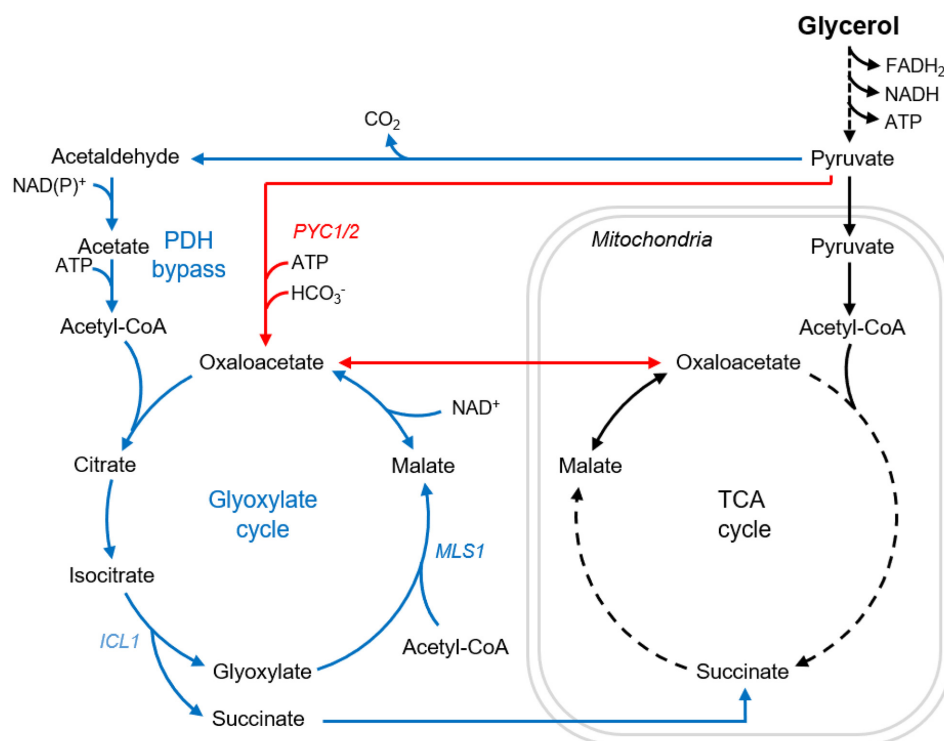

**Figure 1.** The two major anaplerotic routes in *S. cerevisiae* during growth on pure synthetic glycerol medium, pyruvate carboxylase shown in red and the glyoxylate cycle in combination with the pyruvate dehydrogenase (PDH) bypass shown in blue. Abbreviations: *PYC1/PYC2*, pyruvate carboxylase; *ICL1*, isocitrate lyase; *MLS1*, malate synthase.

**Table 3.** Growth assessment of CEN.PK113–1A *UBR2*<sub>CBS</sub> *GUT1*<sub>JL1</sub> derivatives carrying individual and combined deletions in the genes *PYC1*, *PYC2* and *ICL1*. *PYC1* and *PYC2* code for isoforms of *PYC*, while *ICL1* encodes isocitrate lyase, a key enzyme of the glyoxylate cycle.

| Deletion(s)                              | Growth in synthetic glycerol medium* |
|------------------------------------------|--------------------------------------|
| —                                        | ++                                   |
| <i>pyc1</i> Δ <sup>1</sup>               | +                                    |
| <i>pyc2</i> Δ <sup>1</sup>               | ++                                   |
| <i>pyc1</i> Δ <i>pyc2</i> Δ <sup>1</sup> | +                                    |
| <i>icl1</i> Δ <sup>2</sup>               | ++                                   |
| <i>pyc1</i> Δ <i>icl1</i> Δ <sup>2</sup> | +                                    |
| <i>pyc2</i> Δ <i>icl1</i> Δ <sup>2</sup> | ++                                   |
| <i>pyc1</i> Δ <i>pyc2</i> Δ              | -                                    |
| <i>icl1</i> Δ <sup>3</sup>               | -                                    |

\*The experiments were carried out in synthetic medium containing 6% (v/v) glycerol as the sole carbon source. As the deletion mutants have specific growth deficits on different carbon sources, different media were used for the pre-cultivations.

<sup>1</sup>Pre-cultivations were conducted in synthetic ethanol medium.

<sup>2</sup>Pre-cultivations were conducted in synthetic glucose medium.

<sup>3</sup>Pre-cultivations were conducted in synthetic glucose medium supplemented with aspartate.

++Growth comparable to parent strain.

+Significantly reduced growth.

-No growth.

et al. 1994; Blazquez, Gamo and Gancedo 1995), pre-cultivations were performed in synthetic medium with ethanol. The reference strain as well as the *pyc1*Δ and *pyc2*Δ mutants were treated in the same way for a reliable comparison. The data (Table 3) show that both the *pyc1*Δ and *pyc2*Δ single and the *pyc1*Δ *pyc2*Δ double deletion strain were all able to grow in

synthetic glycerol medium. Still, there was a difference with regard to the two *PYC* isogenes: mutants carrying a deletion of *PYC1* (either individually or in combination with the *PYC2* deletion) were negatively affected in their growth, while the *pyc2* single deletion strain did not show any reduction in growth compared to the reference strain. In order to quantify the strains' maximum growth rates, all mutants were pre-cultivated in synthetic glycerol medium. Main cultures were then adjusted for the same start optical density (600 nm) and the growth rates of all strains were afterwards determined as described in Materials and Methods. The results show that the deletion of *PYC2* (alone and in combination) indeed did not significantly affect growth on glycerol (Fig. 2A). In contrast, the deletion of *PYC1* remarkably reduced  $\mu_{max}$  in all strains confirming the major importance of this enzyme for anaplerosis of the TCA cycle under these conditions (Fig. 2A). Our results match a previous finding showing that *PYC1* expression is highly upregulated on glycerol (Menéndez and Gancedo 1998). The strong impact of the *PYC1* deletion on growth is very different from the situation on glucose. In fact, neither the individual deletion of *PYC1* nor of *PYC2* resulted in significant phenotypic changes on glucose (Stucka et al. 1991). In contrast to glycerol, it seems that the pyruvate carboxylase isoenzyme encoded by *PYC2* is able to effectively compensate a lack of *Pyc1* activity when cells grow on glucose.

The fact that the *pyc1*Δ *pyc2*Δ double mutant strain still grows fairly well on glycerol clearly suggests that a metabolic route other than *PYC* significantly contributes to the replenishment of the TCA cycle intermediates on glycerol. The next hypothetical route tested was the glyoxylate cycle. This cycle, which is essential for growth on C2 compounds, could also serve as an anaplerotic route if carbon from pyruvate was channeled via the pyruvate dehydrogenase (PDH) bypass to form cytosolic acetyl-CoA (Fig. 1). We speculated that the metabolic



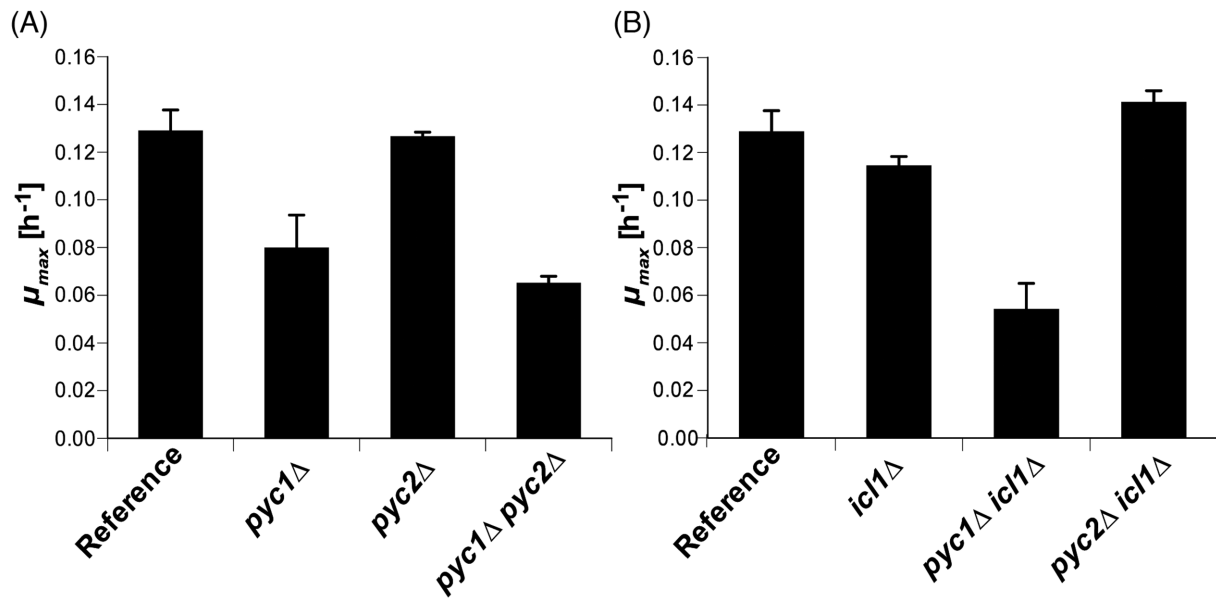

**Figure 2.**  $\mu_{max}$  of *S. cerevisiae* strain CEN.PK113–1A *UBR2*<sub>CBS</sub> *GUT1*<sub>JL1</sub> and its derivatives carrying individual or combined deletions in the isogenes encoding for pyruvate carboxylase (PYC1 and PYC2) (A) as well as in the gene *ICL1* (encoding isocitrate lyase, a key enzyme of the glyoxylate cycle) alone or in combination with a deletion of PYC1 or PYC2 (B). Pre-cultures, intermediate and main cultures were performed in synthetic medium containing 6% (v/v) glycerol as the sole carbon source (SMG). Mean values and standard deviations were determined from at least three biological replicates.

flux via the pyruvate dehydrogenase bypass might be relatively strong in glycerol. This idea is supported by Kito et al. (2016) and Dueñas-Sánchez et al. (2012) who reported in their studies a higher expression of genes encoding the enzymes contributing to the pyruvate dehydrogenase bypass such as Ald2, Ald3 and Acs1. The authors analyzed the respective expression levels in cells grown in complex medium with glycerol in comparison to glucose as the carbon source either at the level of mRNA (Dueñas-Sánchez et al. 2012) or protein (Kito et al. 2016). To verify this hypothesis, we abolished the activity of the glyoxylate cycle by deleting *ICL1* individually as well as in combination with the aforementioned *PYC1/2* deletions. The pre-cultivations to assess the qualitative growth of the mutant strains on glycerol could not be performed in synthetic ethanol medium because an active glyoxylate cycle is indispensable for growth on C2 carbon sources such as ethanol and acetate. Instead, synthetic glucose medium was used for the pre-cultivation of the *icl1* $\Delta$ , *pyc1* $\Delta$  *icl1* $\Delta$  and *pyc2* $\Delta$  *icl1* $\Delta$  mutants and, for the *pyc1* $\Delta$  *pyc2* $\Delta$  *icl1* $\Delta$  mutant, the pre-cultivation medium was supplemented with aspartate. The data in Table 3 shows that all strains except the *pyc1* $\Delta$  *pyc2* $\Delta$  *icl1* $\Delta$  triple deletion mutant grew in synthetic glycerol medium. Further quantitative analysis of the first three strains on glycerol (with pre-cultivations on glycerol) showed that the deletion of *ICL1* only marginally reduced the growth rate of the reference strain, but it did not significantly reduce growth in the *pyc2* $\Delta$  deletion mutant (Fig. 2B). Interestingly, the same *ICL1* deletion in a *pyc1* $\Delta$  background significantly reduced the growth rate by additional 20% (Fig. 2B). The first conclusion drawn from these results is that the glyoxylate cycle is not crucial during growth on synthetic glycerol medium. This is based on the fact that the impact on growth of the sole deletion of *ICL1* was only marginal and in clear contrast to growth on ethanol. The second conclusion is that both *Pyc2* and the glyoxylate cycle seem to be able to replenish the TCA cycle when *Pyc1* is absent (Fig. 2). This assumption was based on the findings that (i) the triple deletion mutant (*pyc1* $\Delta$  *pyc2* $\Delta$  *icl1* $\Delta$  strain) did not grow at all on glycerol, and (ii) the deletion of

neither *ICL1* nor *PYC2* in a *pyc1* $\Delta$  mutant strain led to growth abolishment. Another conclusion that can be drawn from our result with the triple deletion mutant (*pyc1* $\Delta$  *pyc2* $\Delta$  *icl1* $\Delta$  strain) is that there seems to be no anaplerotic route of major importance other than *PYC* and the glyoxylate cycle when *S. cerevisiae* is growing on glycerol, and both can partly take over the function of being the main anaplerotic reaction in the absence of the other route. The latter result also implies that phosphoenolpyruvate carboxykinase (*PCK1*), which reversibly converts phosphoenolpyruvate to oxaloacetate, does not seem to be crucial as an anaplerotic route on glycerol. This finding is in line with previous reports where *PEPCK* is generally considered a decarboxylating enzyme with a function in gluconeogenesis (De Torriontegui, Palacián and Losada 1966).

In the light of our results, it is interesting to note that there is a previous report about a *pyc1* $\Delta$  *pyc2* $\Delta$  double deletion mutant that was able to grow on glucose after mutagenesis. It turned out that the respective mutant showed a derepression of the glyoxylate cycle which allowed to overcome the necessity of supplementing the medium with C4 compounds (Blazquez, Gamo and Gancedo 1995). This metabolic situation resembles the one we assume for our strain growing on glycerol, a carbon source that does not show catabolite repression of the glyoxylate cycle. Similarly, the *pyc1* $\Delta$  *pyc2* $\Delta$  double deletion mutant was also able to grow on pyruvate (C3) but it did not grow on fructose (C6) and galactose (C6) as sole carbon source (data not shown).

As reviewed by Klein et al. (2017), *S. cerevisiae* naturally catabolizes glycerol via the so-called L-G3P pathway. We previously replaced the endogenous L-G3P pathway by an artificial NAD<sup>+</sup>-dependent pathway referred to as ‘DHA pathway’ (Klein et al. 2016). This modification was meant to allow the entrapment of all electrons originating from glycerol in the form of soluble cytosolic NADH (instead of enzyme-bound FADH<sub>2</sub>). We also tested some of the above-mentioned deletions in a DHA pathway strain background in order to investigate whether the same routes are responsible for anaplerosis as in the strain CEN.PK113–1A *UBR2*<sub>CBS</sub> *GUT1*<sub>JL1</sub>. At least, we have been able to

show so far that individual deletions of the genes *PYC1*, *PYC2* and *ICL1* led to a similar growth reduction compared to the respective control strain (data not shown).

Glycerol is an attractive carbon source in industrial biotechnology due to its relatively high degree of reduction and its liquid nature. Moreover, it is a major by-product during biodiesel production. Our current study demonstrates that *S. cerevisiae* shows a higher metabolic flexibility with regard to the use of anaerobic routes on glycerol. This is different from glucose and ethanol where only one route is used and the abolishment of the respective route leads to a growth defect. Although *Pyc1* seems to be the most important anaerobic enzyme, alternative routes, i.e. *Pyc2* and the glyoxylate cycle (in combination with the pyruvate dehydrogenase bypass) contribute to this function.

## ACKNOWLEDGEMENTS

We thank Solvejg Marotzke for technical support.

## FUNDING

We thank the German Research Foundation (DFG) for funding of our research (NE 697/7-1).

**Conflict of interest.** The authors declare no competing interest.

## REFERENCES

- Bertani G. Studies on lysogeny. I. The mode of phage liberation by lysogenic *Escherichia coli*. *J Bacteriol* 1951;62:293–300.
- Blazquez MA, Gamo FJ, Gancedo C. A mutation affecting carbon catabolite repression suppresses growth defects in pyruvate carboxylase mutants from *Saccharomyces cerevisiae*. *FEBS Lett* 1995;377:197–200.
- Borodina I, Nielsen J. Advances in metabolic engineering of yeast *Saccharomyces cerevisiae* for production of chemicals. *Biotechnol J* 2014;9:609–20.
- Brewster NK, Val DL, Walker ME et al. Regulation of pyruvate carboxylase isozyme (*PYC1*, *PYC2*) gene expression in *Saccharomyces cerevisiae* during fermentative and nonfermentative growth. *Arch Biochem Biophys* 1994;311:62–71.
- Chen Y, Nielsen J. Biobased organic acids production by metabolically engineered microorganisms. *Curr Opin Biotechnol* 2016;37:165–72.
- Crabtree HG. Observations on the carbohydrate metabolism of tumours. *Biochem J* 1929;23:536.
- De Deken RH. The Crabtree effect: a regulatory system in yeast. *J Gen Microbiol* 1966;44:149–56.
- De Jong-Gubbels P, Bauer J, Niederberger P et al. Physiological characterisation of a pyruvate-carboxylase-negative *Saccharomyces cerevisiae* mutant in batch and chemostat cultures. *Anton Van Lee* 1998;74:253–63.
- De Torrontegui G, Palacián E, Losada M. Phosphoenolpyruvate carboxykinase in gluconeogenesis and its repression by hexoses in yeasts. *Biochem Biophys Res Commun* 1966;22:227–31.
- Delvigne F, Lejeune A, Destain J et al. Stochastic models to study the impact of mixing on a fed-batch culture of *Saccharomyces cerevisiae*. *Biotechnol Prog* 2006;22:259–69.
- Dueñas-Sánchez R, Gutiérrez G, Rincón AM et al. Transcriptional regulation of fermentative and respiratory metabolism in *Saccharomyces cerevisiae* industrial bakers' strains. *FEMS Yeast Res* 2012;12:625–36.
- Fowler JD, Dunlop EH. Effects of reactant heterogeneity and mixing on catabolite repression in cultures of *Saccharomyces cerevisiae*. *Biotechnol Bioeng* 1989;33:1039–46.
- Gailiuisis J, Rinne RW, Benedict CR. Pyruvate-oxaloacetate exchange reaction in baker's yeast. *Biochim Biophys Acta* 1964;92:595–601.
- Galao RP, Scheller N, Alves-Rodrigues I et al. *Saccharomyces cerevisiae*: a versatile eukaryotic system in virology. *Microb Cell Fact* 2007;6:32.
- Gietz RD, Schiestl RH, Willems AR et al. Studies on the transformation of intact yeast cells by the LiAc/SS-DNA/PEG procedure. *Yeast* 1995;11:355–60.
- Gueldener U, Heinisch J, Koehler GJ et al. A second set of *loxP* marker cassettes for Cre-mediated multiple gene knockouts in budding yeast. *Nucleic Acids Res* 2002;30:e23.
- Ho PW, Swinnen S, Duitama J et al. The sole introduction of two single-point mutations establishes glycerol utilization in *Saccharomyces cerevisiae* CEN.PK derivatives. *Biotechnol Biofuels* 2017;10:10.
- Kito K, Ito H, Nohara T et al. Yeast interspecies comparative proteomics reveals divergence in expression profiles and provides insights into proteome resource allocation and evolutionary roles of gene duplication. *Mol Cell Proteomics* 2016;15:218–35.
- Klein M, Carrillo M, Xiberras J et al. Towards the exploitation of glycerol's high reducing power in *Saccharomyces cerevisiae*-based bioprocesses. *Metab Eng* 2016;38:464–72.
- Klein M, Swinnen S, Thevelein JM et al. Glycerol metabolism and transport in yeast and fungi: established knowledge and ambiguities. *Environ Microbiol* 2017;19:878–93.
- Mattam AJ, Clomburg JM, Gonzalez R et al. Fermentation of glycerol and production of valuable chemical and biofuel molecules. *Biotechnol Lett* 2013;35:831–42.
- Menéndez J, Gancedo C. Regulatory regions in the promoters of the *Saccharomyces cerevisiae* *PYC1* and *PYC2* genes encoding isoenzymes of pyruvate carboxylase. *FEMS Microbiol Lett* 1998;164:345–52.
- Morris CP, Lim F, Wallace JC. Yeast pyruvate carboxylase: gene isolation. *Biochem Biophys Res Commun* 1987;145:390–6.
- Nevoigt E. Progress in metabolic engineering of *Saccharomyces cerevisiae*. *Microbiol Mol Biol Rev* 2008;72:379–412.
- Ochoa-Estopier A, Lesage J, Gorret N et al. Kinetic analysis of a *Saccharomyces cerevisiae* strain adapted for improved growth on glycerol: implications for the development of yeast bioprocesses on glycerol. *Bioresour Technol* 2011;102:1521–7.
- Sauer B, Henderson N. Site-specific DNA recombination in mammalian cells by the Cre recombinase of bacteriophage P1. *Proc Natl Acad Sci* 1988;85:5166.
- Schöler A, Schüller HJ. Structure and regulation of the isocitrate lyase gene *ICL1* from the yeast *Saccharomyces cerevisiae*. *Curr Genet* 1993;23:375–81.
- Schüller H-J. Transcriptional control of nonfermentative metabolism in the yeast *Saccharomyces cerevisiae*. *Curr Genet* 2003;43:139–60.
- Stucka R, Dequin S, Salmon JM et al. DNA sequences in chromosomes II and VII code for pyruvate carboxylase isoenzymes in *Saccharomyces cerevisiae*: analysis of pyruvate carboxylase-deficient strains. *Mol Genomics Genet* 1991;229:307–15.
- Swinnen S, Ho P-W, Klein M et al. Genetic determinants for enhanced glycerol growth of *Saccharomyces cerevisiae*. *Metab Eng* 2016;36:69–79.
- Swinnen S, Klein M, Carrillo M et al. Re-evaluation of glycerol utilization in *Saccharomyces cerevisiae*: characterization of an

- isolate that grows on glycerol without supporting supplements. *Biotechnol Biofuels* 2013;**6**:157.
- Turcotte B, Liang X, Robert F et al. Transcriptional regulation of nonfermentable carbon utilization in budding yeast. *FEMS Yeast Res* 2010;**10**:2–13.
- Verduyn C, Postma E, Scheffers WA et al. Effect of benzoic acid on metabolic fluxes in yeasts: a continuous-culture study on the regulation of respiration and alcoholic fermentation. *Yeast* 1992;**8**:501–17.
- Walker ME, Val DL, Rohde M et al. Yeast pyruvate carboxylase: identification of two genes encoding isoenzymes. *Biochem Biophys Res Commun* 1991;**176**:1210–7.
- Xiberras J, Klein M, Nevoigt E. Glycerol as a substrate for *Saccharomyces cerevisiae* based bioprocesses – knowledge gaps regarding the central carbon catabolism of this ‘non-fermentable’ carbon source. *Biotechnol Adv* 2019;**37**:107378.
- Yazdani SS, Gonzalez R. Anaerobic fermentation of glycerol: a path to economic viability for the biofuels industry. *Curr Opin Biotechnol* 2007;**18**:213–9.
- Zelle RM, Harrison JC, Pronk JT et al. Anaplerotic role for cytosolic malic enzyme in engineered *Saccharomyces cerevisiae* strains. *Appl Environ Microbiol* 2011;**77**:732–8.
- Zelle RM, Trueheart J, Harrison JC et al. Phosphoenolpyruvate carboxykinase as the sole anaplerotic enzyme in *Saccharomyces cerevisiae*. *Appl Environ Microbiol* 2010;**76**:5383–9.
- Zhang L, Tang Y, Guo Z et al. Engineering of the glycerol decomposition pathway and cofactor regulation in an industrial yeast improves ethanol production. *J Ind Microbiol Biotechnol* 2013;**40**:1153–60.
